# Supplementary material
Source: PubMed Central journal article supplement (PMC3437258)

**Figure S1**

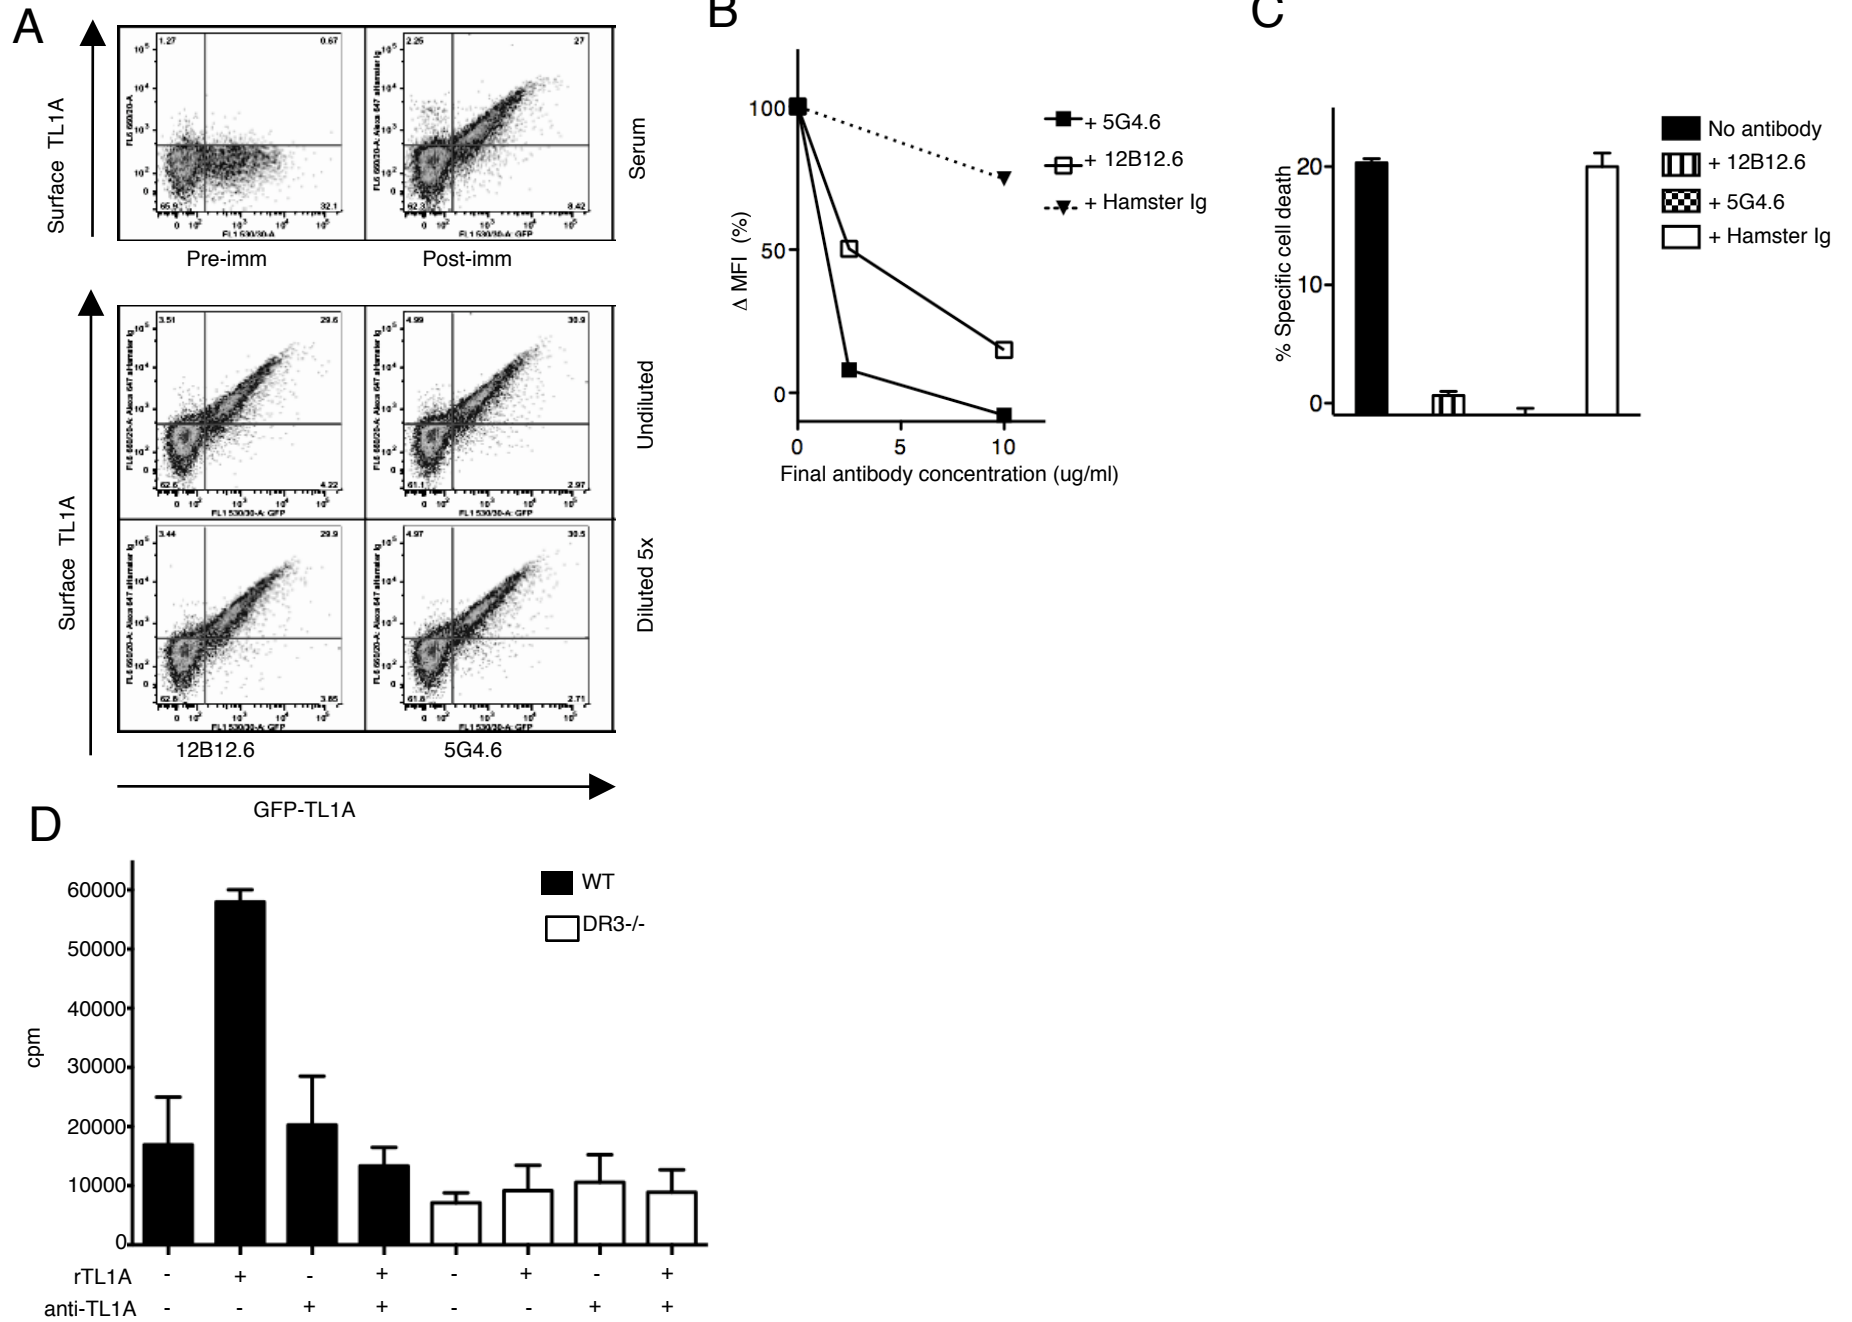

Figure S2

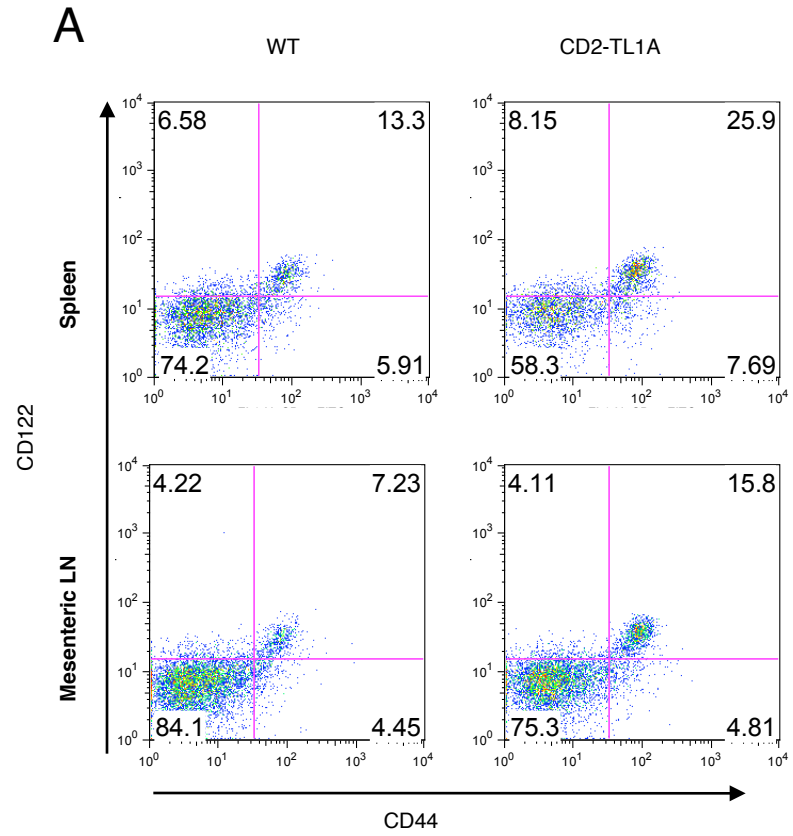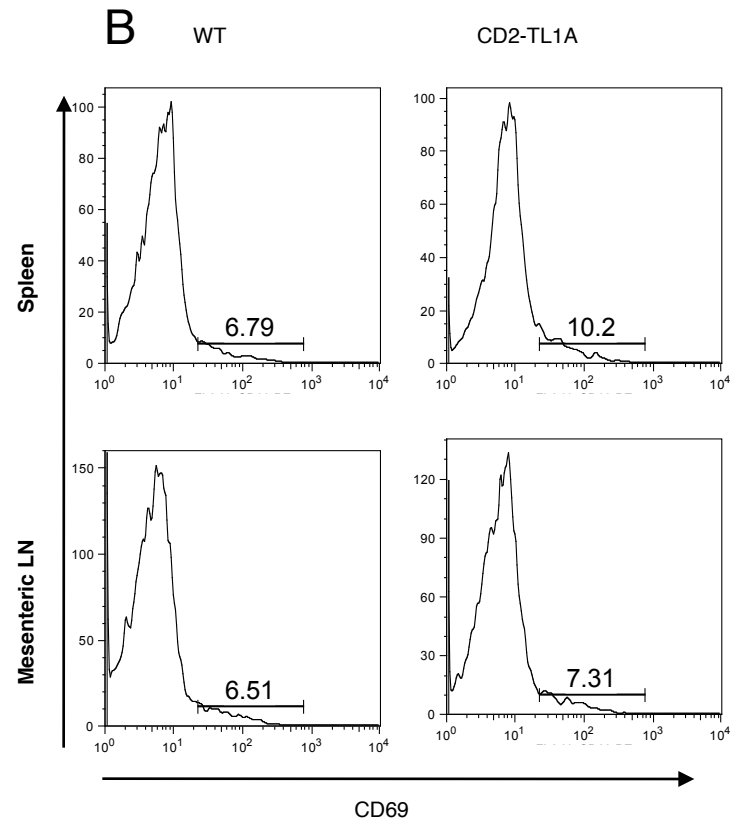

Figure S3

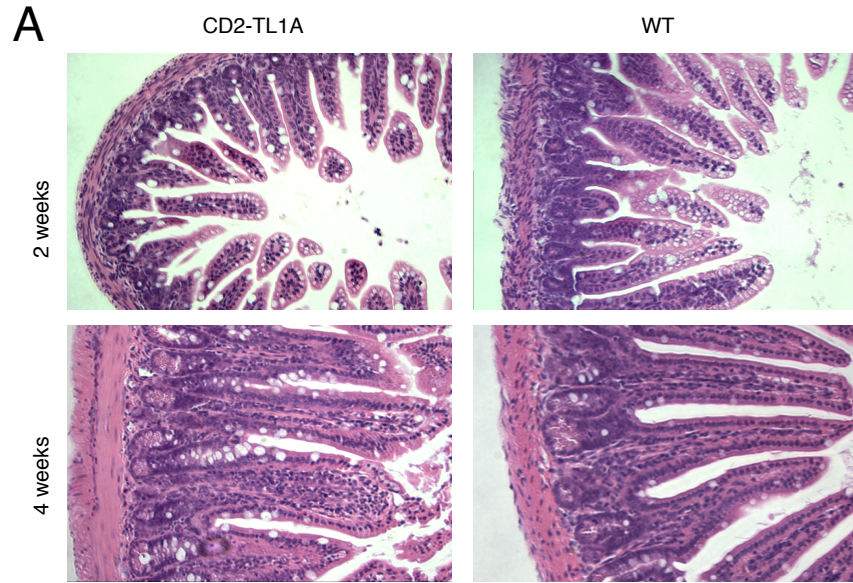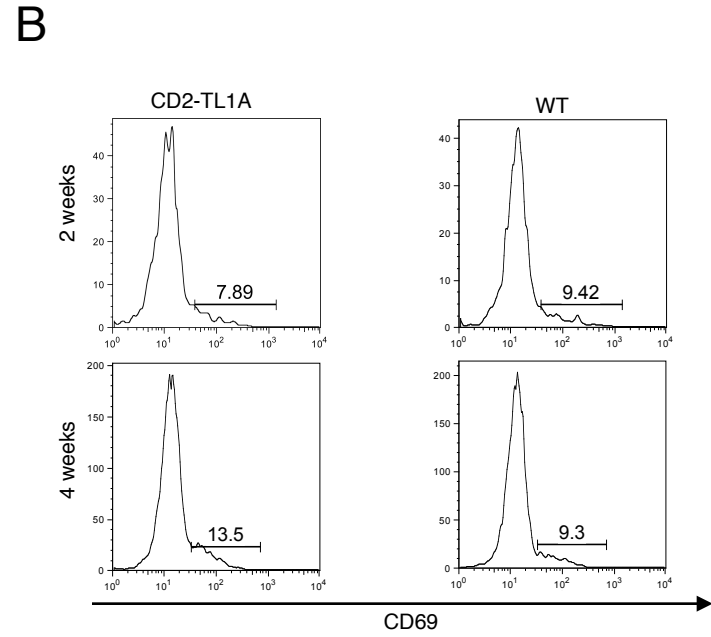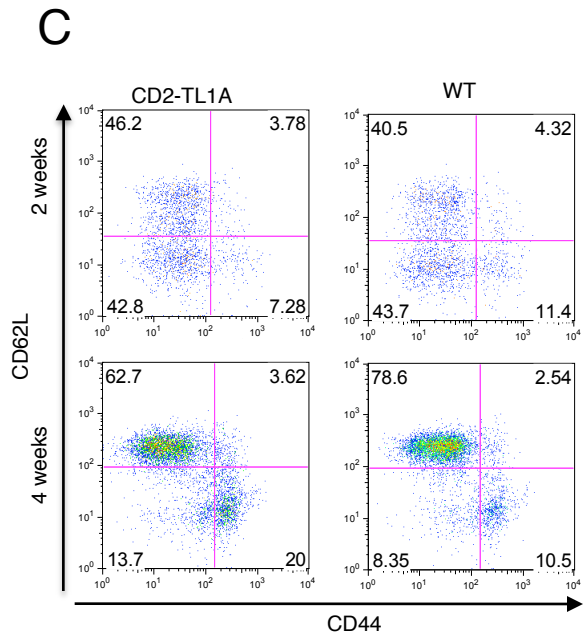

Figure S4

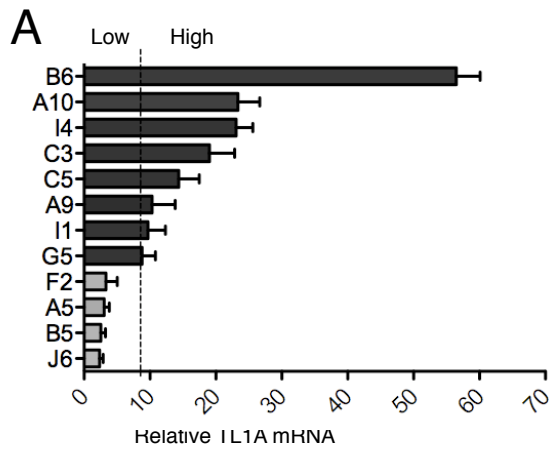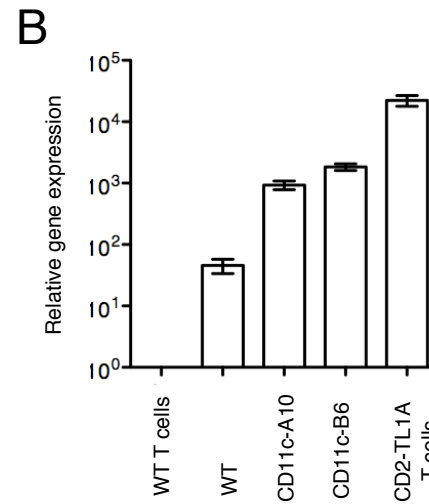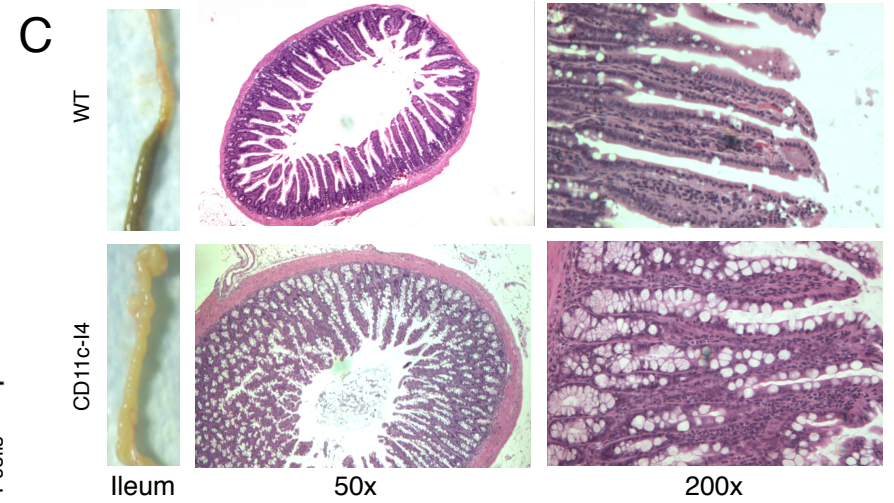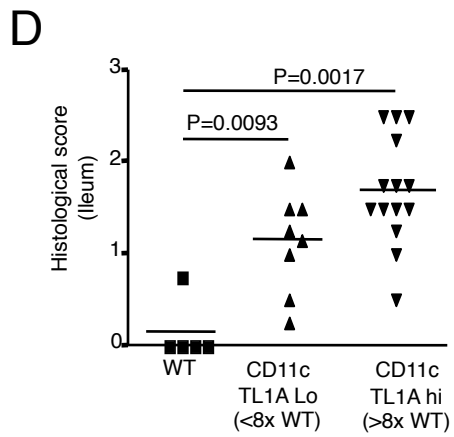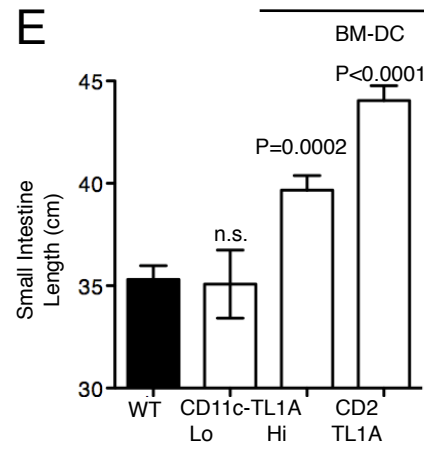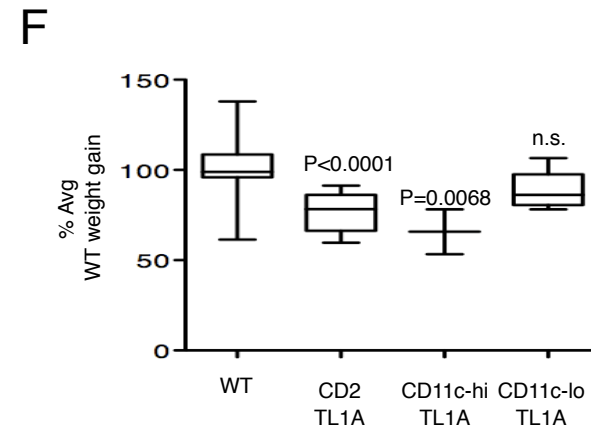

Figure S5

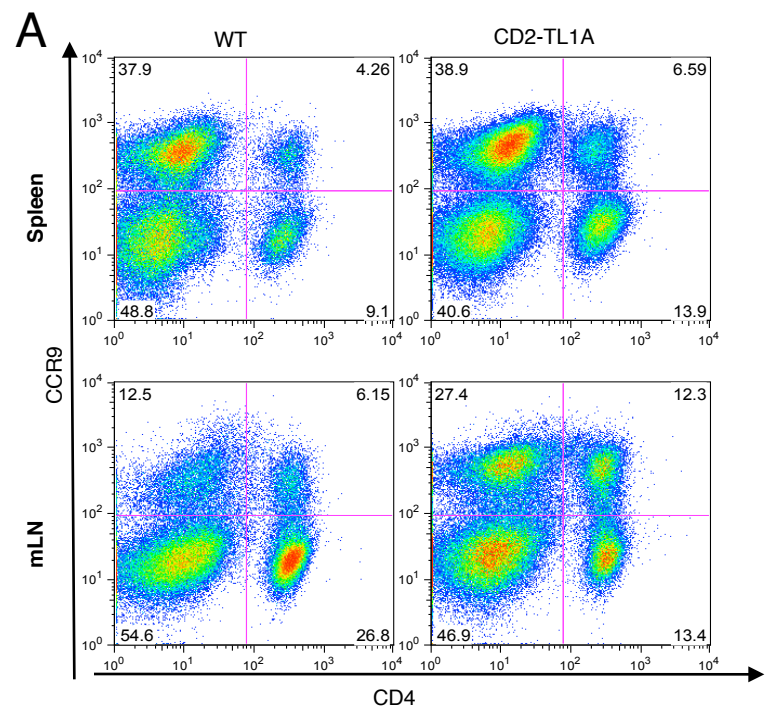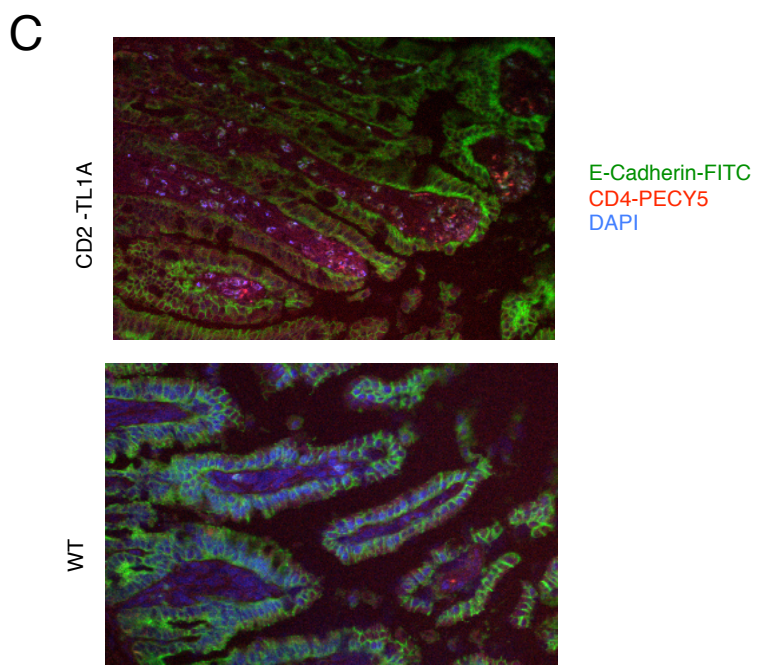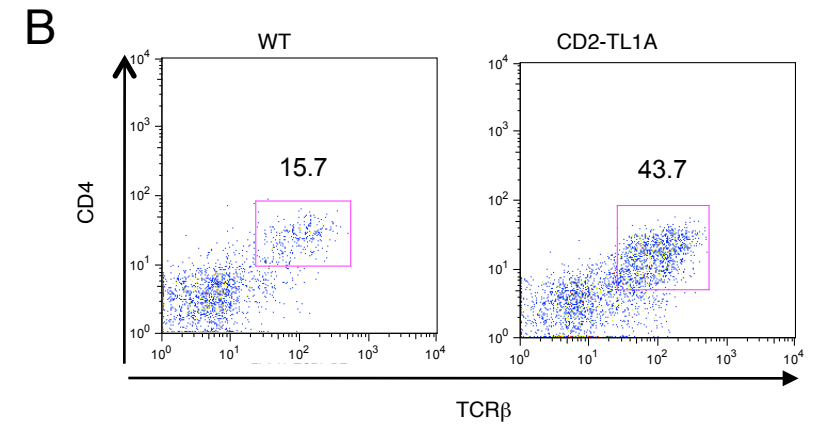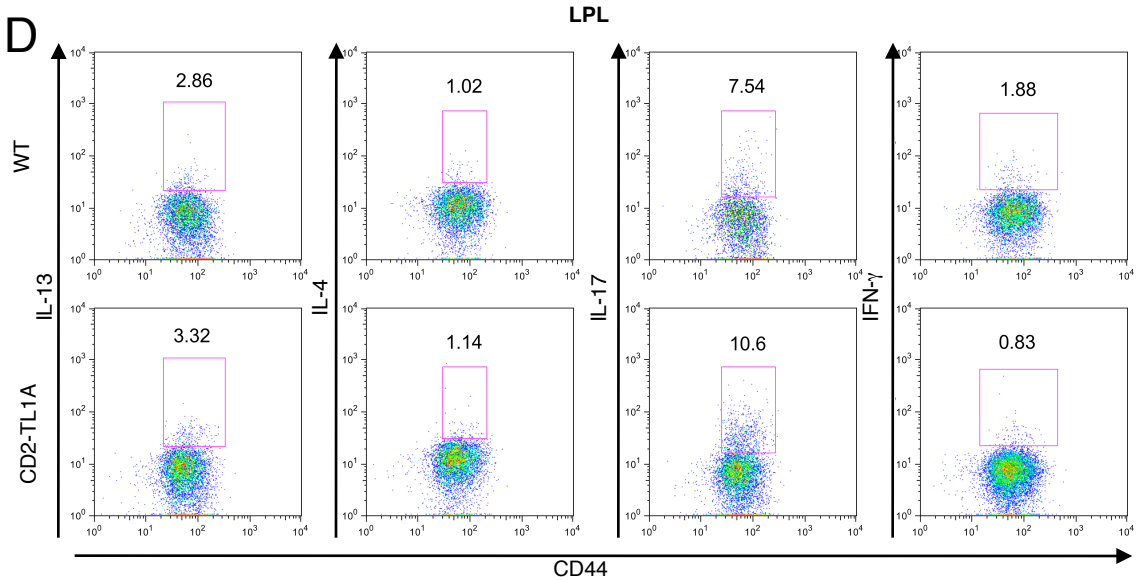

Figure S6

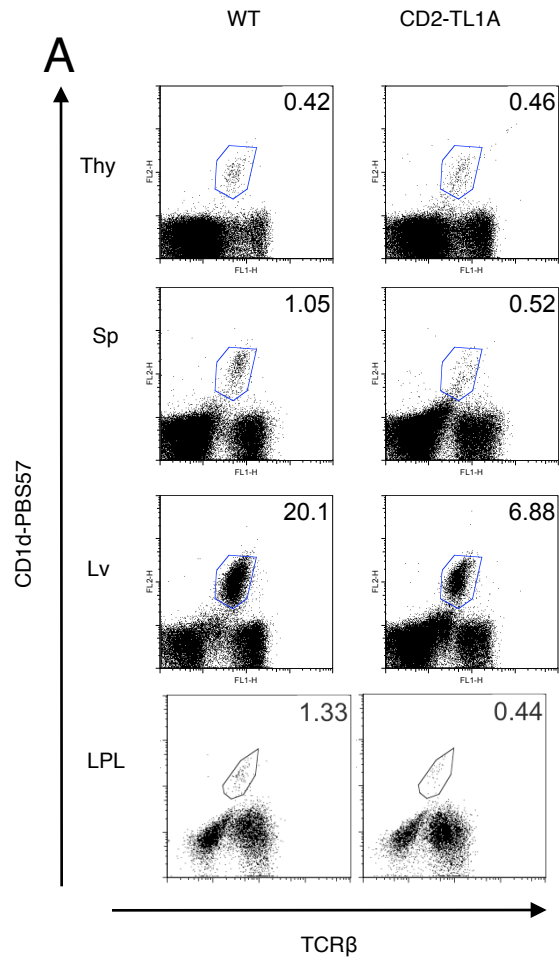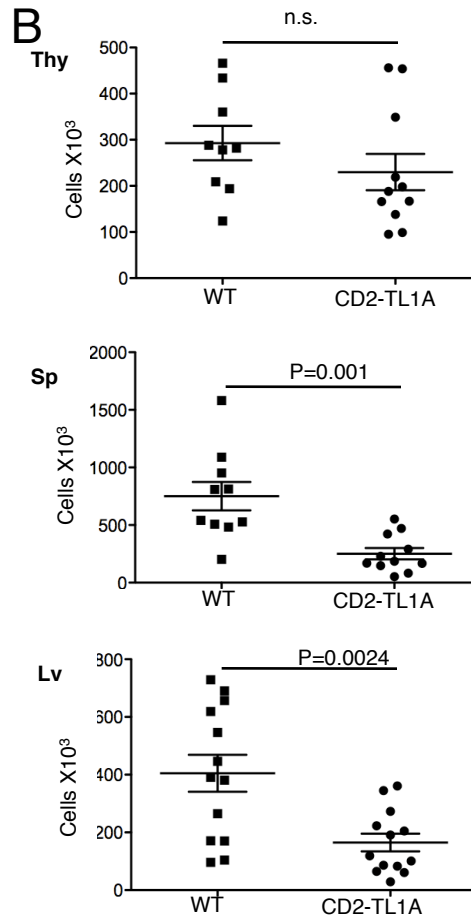

Figure S7

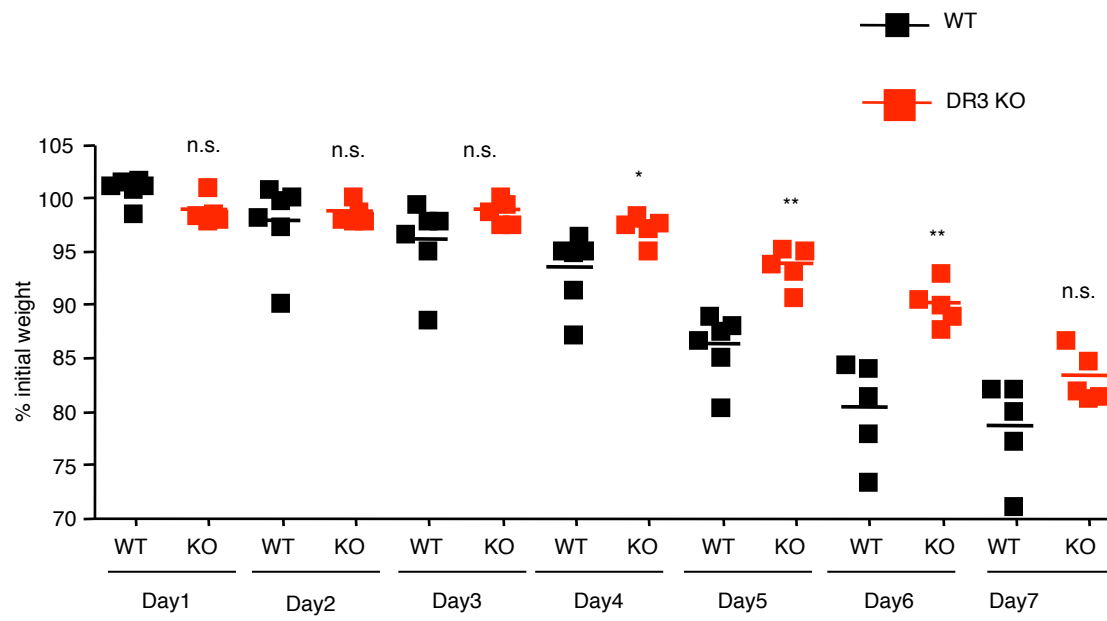

Supplement: NIHMS240726-supplement-Supp1.pdf [file NIHMS240726-supplement-Supp1.pdf]

Figure S2



Supplement: NIHMS240726-supplement-Supp2.pdf [file NIHMS240726-supplement-Supp2.pdf]

Figure S3

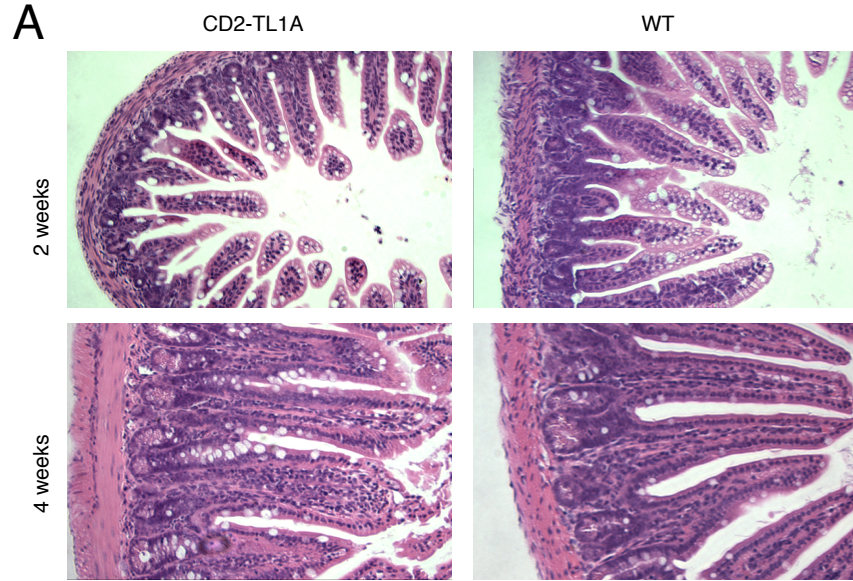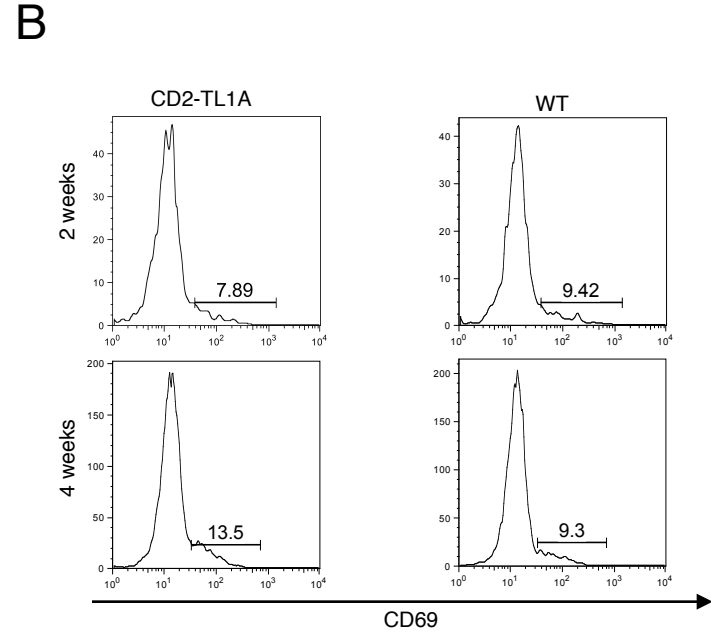

Supplement: NIHMS240726-supplement-Supp3.pdf [file NIHMS240726-supplement-Supp3.pdf]

Figure S4

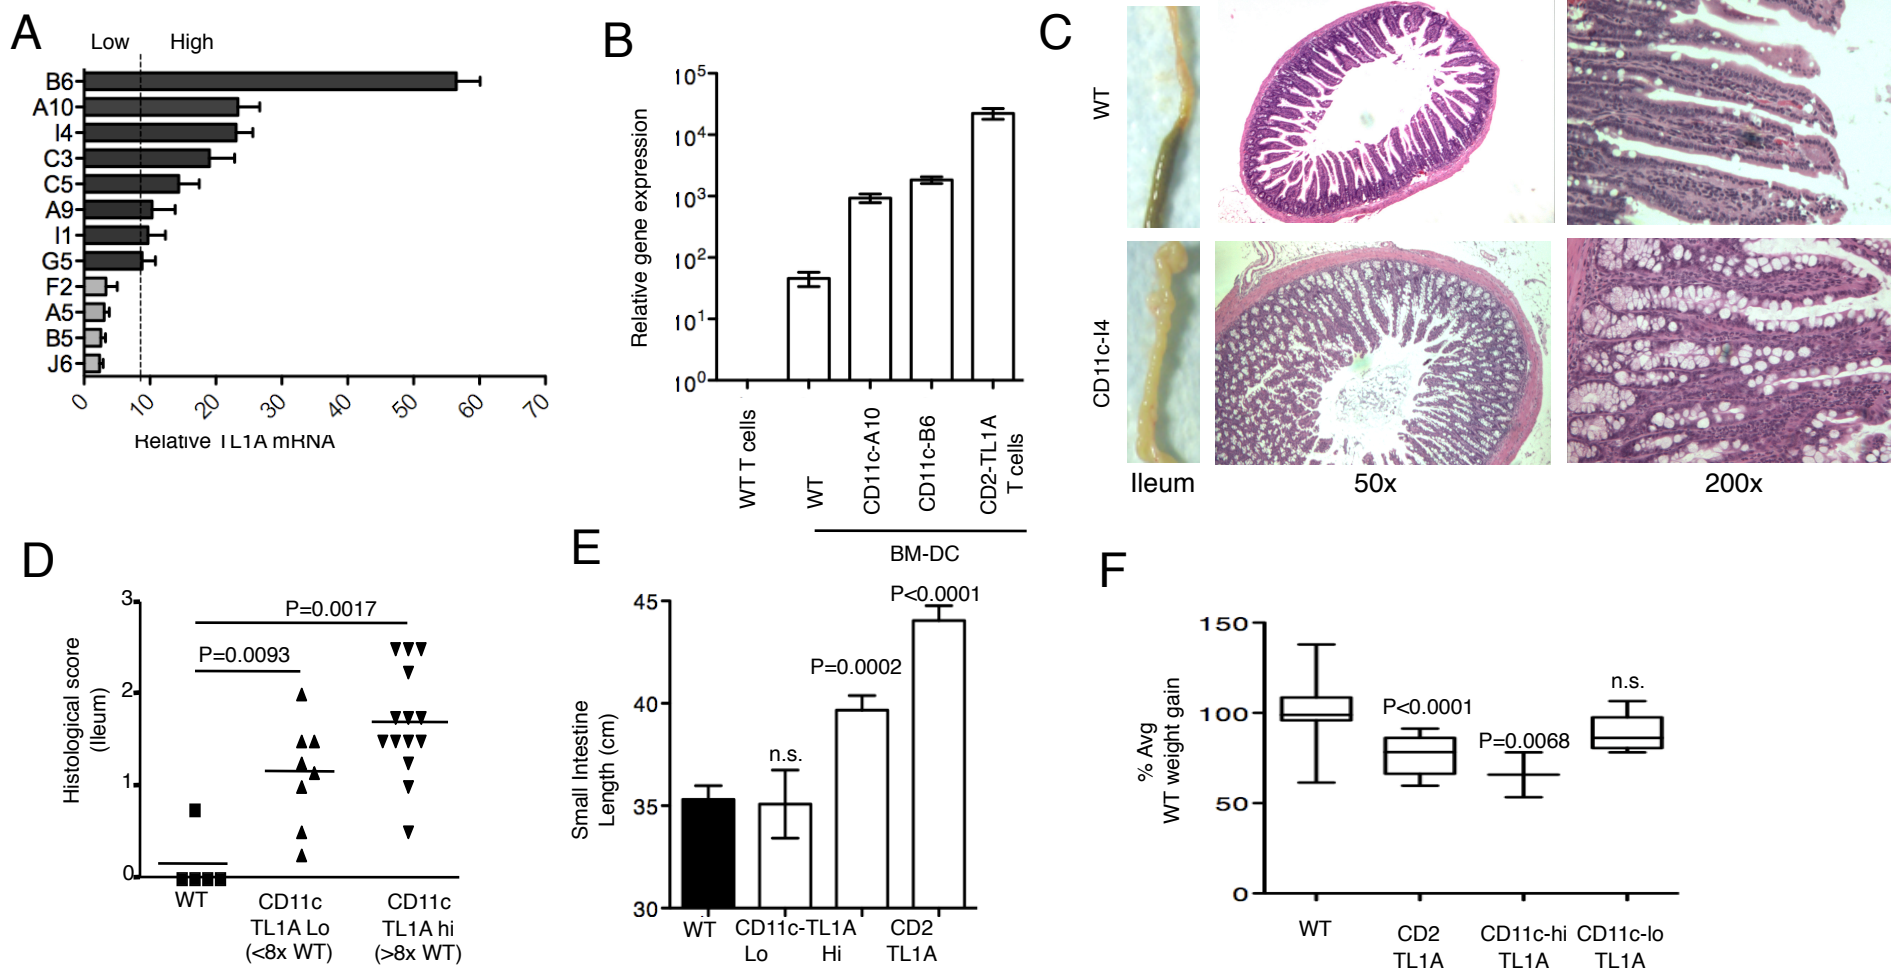

Supplement: NIHMS240726-supplement-Supp4.pdf [file NIHMS240726-supplement-Supp4.pdf]

Figure S5

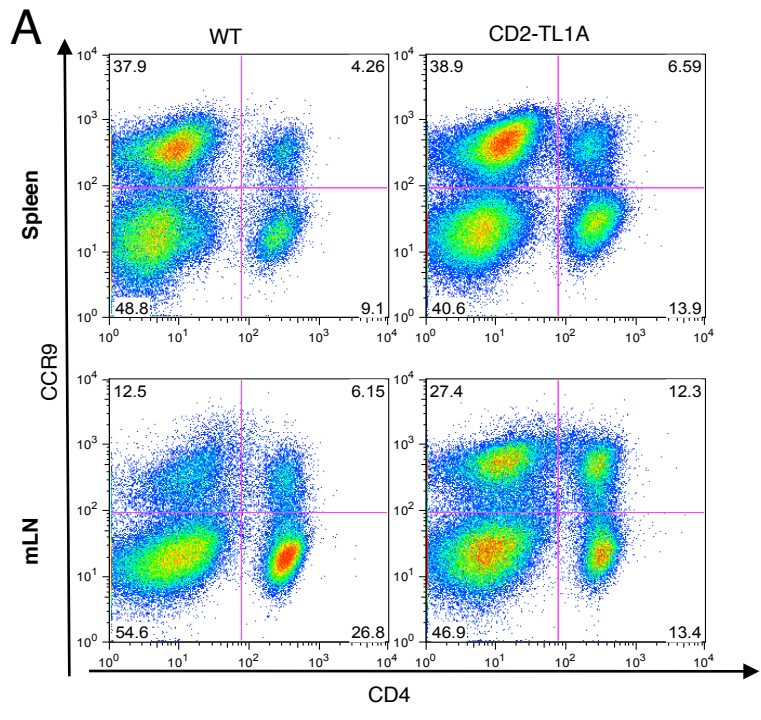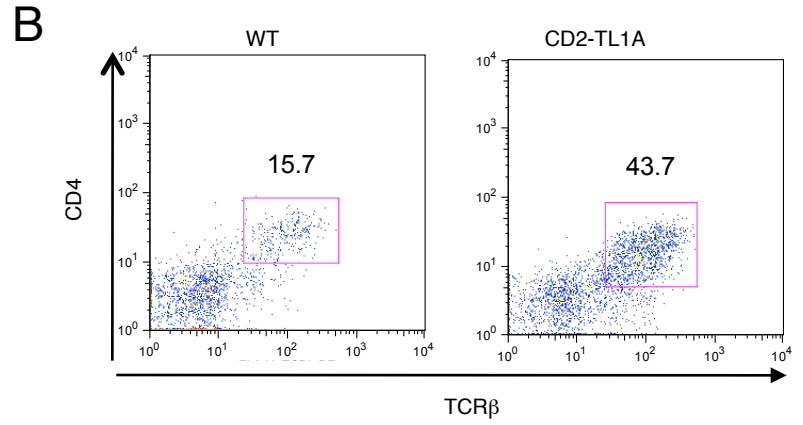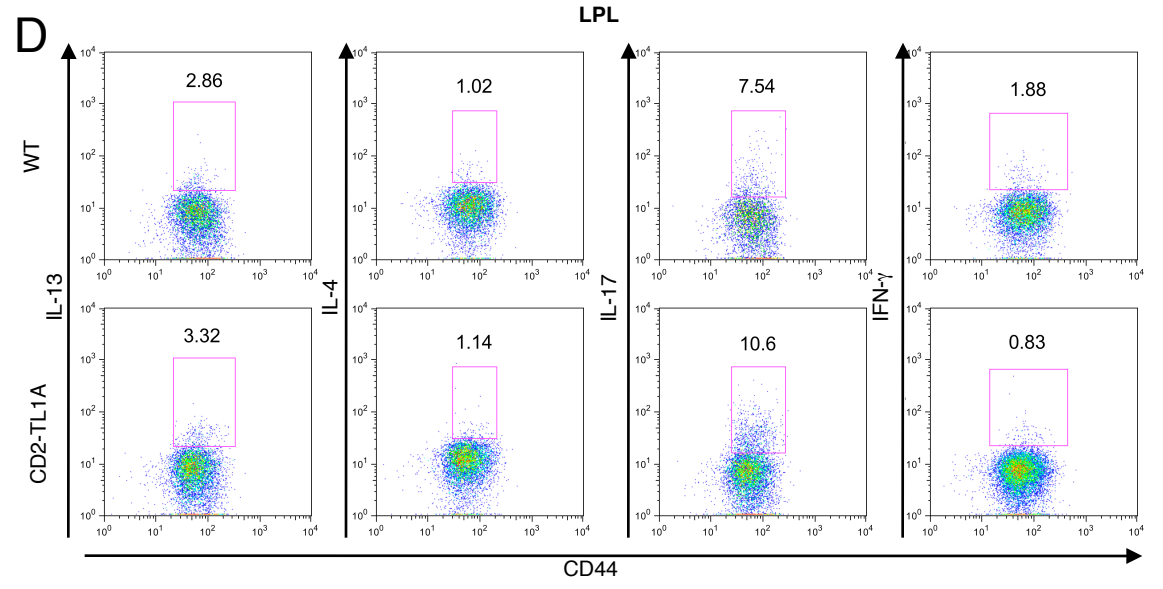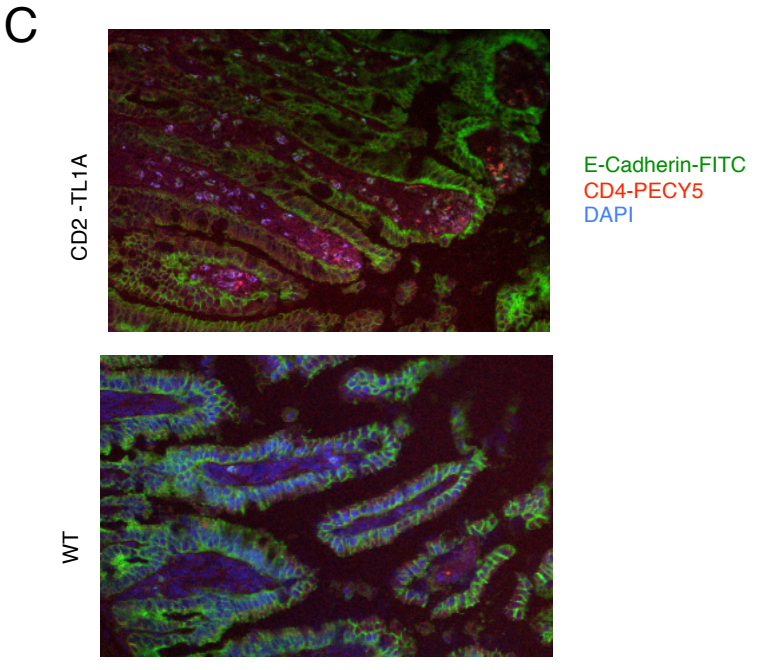

Supplement: NIHMS240726-supplement-Supp5.pdf [file NIHMS240726-supplement-Supp5.pdf]

Figure S6



Supplement: NIHMS240726-supplement-Supp6.pdf [file NIHMS240726-supplement-Supp6.pdf]

Figure S7

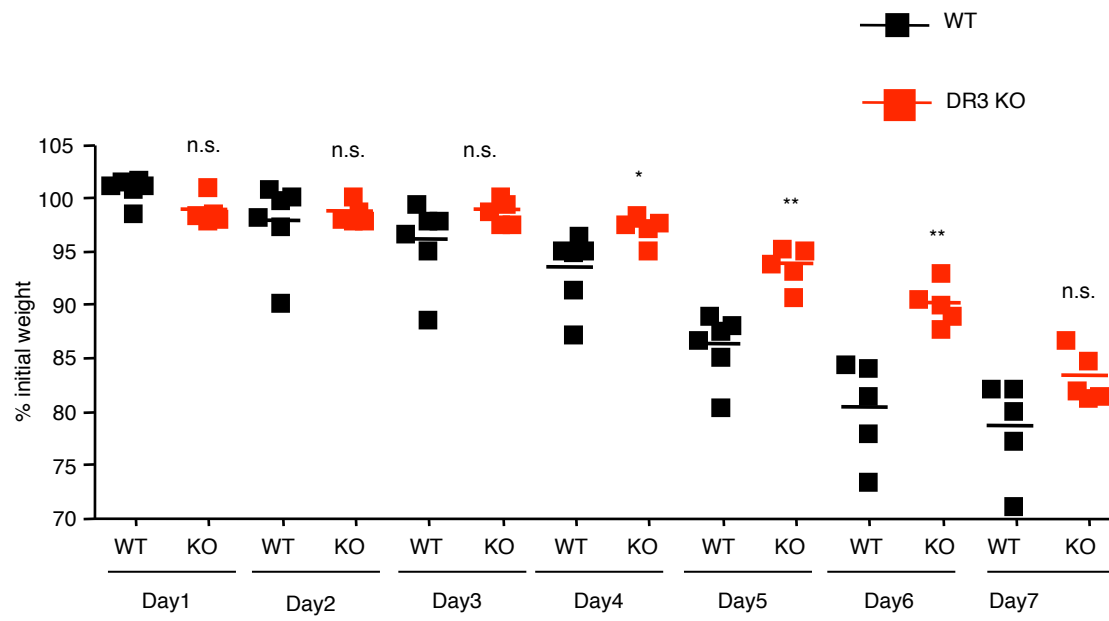

Supplement: NIHMS240726-supplement-Supp7.pdf [file NIHMS240726-supplement-Supp7.pdf]
